# Supplementary material for: Hydrophobic Organic Pollutants in Soils and Dusts at Electronic Waste Recycling Sites: Occurrence and Possible Impacts of Polybrominated Diphenyl Ethers
Source: PubMed Central journal article supplement (PMC6388296; doi:10.3390/ijerph16030360), 2019-01-28
Supplement: ijerph-16-00360-s001.pdf [file ijerph-16-00360-s001.pdf]

### Supplementary Materials

**Table S1a.** Summary of the Physicochemical parameters (mean of pH and Total Organic matter content) of the samples at the study locations. No standard deviation is given if n=1.

|               | Burning Sites |         | Dismantling Sites |           | Repair Sites |           | Control Sites |           |
|---------------|---------------|---------|-------------------|-----------|--------------|-----------|---------------|-----------|
|               | pH            | TOC%    | pH                | TOC%      | pH           | TOC%      | pH            | TOC%      |
| Soil          | 7.8 ± 0.43    | 20 ± 11 | 5.8 ± 3           | 7.4 ± 6.3 | 8.8          | 1.5       | 8.0 ± 0.4     | 3.2 ± 0.9 |
| Roadside dust | -             | -       | 8.3 ± 0.06        | 4.4 ± 2.6 | 8.1          | 1.5       | 8.3 ± 0.5     | 1.3 ± 0.3 |
| Floor dust    | -             | -       | 8.4 ± 0.24        | 5 ± 1.0   | 8.4 ± 0.3    | 4.1 ± 4.2 | 8.8           | 5.3       |
| Direct dust   | -             | -       | -                 | -         | 9 ± 0.2      | 17.4 ± 6  | -             | -         |

**Table S1b.** Physicochemical parameters (pH and Total Organic Matter Content) of the samples at the study site.

| E-Waste Activity Sites | Lagos     |             |            |              | Ibadan    |            |            |              | Aba       |            |            |              |            |
|------------------------|-----------|-------------|------------|--------------|-----------|------------|------------|--------------|-----------|------------|------------|--------------|------------|
|                        | pH        | Control pH  | %TOC       | Control %TOC | pH        | Control pH | %TOC       | Control %TOC | pH        | Control pH | %TOC       | Control %TOC |            |
| Burning sites          |           |             |            |              |           |            |            |              |           |            |            |              |            |
| Soil(0–10cm)           | Mean ± SD | 7.7         | 7.9 ± 0.4  | 36.3         | 3.5 ± 1.2 | 8.2 ± 0.2  | 8.2 ± 0.24 | 16.8 ± 2.4   | 3.6 ± 1.6 | 7.5 ± 0.44 | 7.5 ± 0.62 | 16 ± 11.5    | 2.3 ± 0.7  |
|                        | Minimum   | 7.7         | 7.41       | 36.3         | 2.4       | 8.03       | 8.1        | 15.1         | 2.5       | 7.21       | 7.10       | 7.98         | 1.8        |
|                        | Maximum   | 7.7         | 8.22       | 36.3         | 5.15      | 8.4        | 8.4        | 18.45        | 4.7       | 7.84       | 7.97       | 24.24        | 2.8        |
| Dismantling site       |           |             |            |              |           |            |            |              |           |            |            |              |            |
| Soil(0–10cm)           | Mean ± SD | 7.94 ± 0.23 | 7.9 ± 0.35 | 11 ± 11.4    | 3.5 ± 1.2 | 5 ± 2      | 8.2 ± 0.24 | 5.8 ± 2.5    |           |            |            |              |            |
|                        | Minimum   | 7.74        | 7.41       | 1.58         | 2.4       | 1.94       | 8.07       | 2.74         |           |            |            |              |            |
|                        | Maximum   | 8.2         | 8.22       | 23.69        | 5.15      | 9.0        | 8.41       | 10.3         |           |            |            |              |            |
| Floor dust             | Mean ± SD | 8.4 ± 0.24  |            | 4.9 ± 1      |           |            |            |              |           |            |            |              |            |
|                        | Minimum   | 8.14        |            | 3.71         |           |            |            |              |           |            |            |              |            |
|                        | Maximum   | 8.7         |            | 6.19         |           |            |            |              |           |            |            |              |            |
| Direct dust            | Mean ± SD |             |            |              |           |            |            |              |           |            |            |              |            |
|                        | Minimum   |             |            |              |           |            |            |              |           |            |            |              |            |
|                        | Maximum   |             |            |              |           |            |            |              |           |            |            |              |            |
| Roadside dust          | Mean ± SD | 8.3 ± 0.6   | 8.2 ± 0.6  | 4.4 ± 2.6    | 1.2 ± 0.3 |            |            |              |           | 8.06       | 8.15 ± 0.6 | 1.51         | 1.3 ± 0.35 |
|                        | Minimum   | 8.25        | 7.6        | 2.61         | 0.98      |            |            |              |           | 8.06       | 7.1        | 1.51         | 0.6        |
|                        | Maximum   | 8.34        | 8.7        | 6.24         | 1.6       |            |            |              |           | 8.06       | 9.0        | 1.51         | 1.7        |
| Repair site            |           |             |            |              |           |            |            |              |           |            |            |              |            |
| Floor dust             | Mean ± SD | 8.4 ± 0.6   |            | 3.4 ± 0.95   |           | 8.6 ± 0.4  | 8.8 ± 8.8  | 8.3 ± 7.9    | 5.3 ± 5.3 | 8.2 ± 0.25 |            | 2.4 ± 0.83   |            |
|                        | Minimum   | 8           |            | 1.85         |           | 8.22       | 8.8        | 3.4          | 5.3       | 7.95       |            | 1.14         |            |
|                        | Maximum   | 9           |            | 5.01         |           | 8.96       | 8.8        | 22.33        | 5.3       | 8.8        |            | 3.86         |            |
| Direct dust            | Mean ± SD |             |            |              |           | 9 ± 0.2    |            | 17.4 ± 5.6   |           |            |            |              |            |
|                        | Minimum   |             |            |              |           | 8.8        |            | 10           |           |            |            |              |            |
|                        | Maximum   |             |            |              |           | 9.24       |            | 22.4         |           |            |            |              |            |
| Roadside dust          | Mean ± SD |             |            |              |           |            |            |              |           | 8.1        | 8.4 ± 0.5  | 1.5          | 1.4 ± 0.3  |
|                        | Minimum   |             |            |              |           |            |            |              |           | 8.1        | 7.8        | 1.5          | 0.99       |
|                        | Maximum   |             |            |              |           |            |            |              |           | 8.1        | 9.0        | 1.5          | 1.7        |

**Table S2.** PBDE median concentrations (ng/g dry weight) across various e-waste sites; and exceedance (Ex) of PBDE concentrations in soil and dusts across various e-waste sites compared to control sites in Lagos.

| PBDE               | Top Soil 0–10cm |               |                   |              | Floor Dust (Control Soil) |              |                   |              | Roadside Dust     |              |              |             |              |
|--------------------|-----------------|---------------|-------------------|--------------|---------------------------|--------------|-------------------|--------------|-------------------|--------------|--------------|-------------|--------------|
|                    | Control         | Burning Sites | Dismantling Sites | Repair Sites | Dismantling Sites         | Repair Sites | Dismantling Sites | Repair Sites | Dismantling Sites | Ex           |              |             |              |
| Title              | Median          | Median        | Ex                | Median       | Ex                        | Median       | Ex                | Median       | Ex                | Median       | Ex           |             |              |
| BDE-28             | 0.01            | 40.54         | 4054              | 0.96         | 96.0                      | 0.02         | 2.0               | 0.9          | 88.0              | 0.5          | 50.0         | 0.18        | 18.0         |
| BDE-47             | 0.04            | 17.05         | 426               | 3.67         | 91.8                      | 0.1          | 2.5               | 6.3          | 157.5             | 0.5          | 13.5         | 8.02        | 200.5        |
| BDE-100            | 0.07            | 86.02         | 1229              | 1.4          | 20.0                      | 0.31         | 4.4               | 4.1          | 58.6              | 0.4          | 5.7          | 4.44        | 63.4         |
| BDE-99             | 0.22            | 158.11        | 719               | 10.83        | 49.2                      | 0.53         | 2.4               | 15           | 68.6              | 1.8          | 8.2          | 19          | 86.4         |
| BDE-154            | 0.06            | 80.25         | 1338              | 2.68         | 44.7                      | 0.21         | 3.5               | 5.4          | 90.2              | 0.4          | 6.8          | 2.5         | 41.7         |
| BDE-153            | 0.085           | 64.19         | 755               | 9.93         | 116.8                     | 0.24         | 2.8               | 8.9          | 104.7             | 1.9          | 22.4         | 8.2         | 96.5         |
| BDE-138            | 0.001           | 3.24          | 3240              | 0.14         | 140.0                     | 0            | 0.0               | 0.82         | 820.0             | 0.1          | 120.0        | 0.29        | 290.0        |
| BDE-183            | 0.08            | 153.73        | 1922              | 11.41        | 142.6                     | 0.2          | 2.5               | 17.6         | 219.6             | 5.0          | 62.5         | 10.76       | 134.5        |
| BDE-190            | 0.08            | 164.12        | 2052              | 4.31         | 53.9                      | 0.19         | 2.4               | 3.3          | 41.3              | 0.4          | 5.5          | 1.19        | 14.9         |
| BDE-208            | 0.14            | 497.38        | 3553              | 8.66         | 61.9                      | 0.1          | 0.7               | 6.33         | 45.2              | 3.0          | 21.4         | 3.28        | 23.4         |
| BDE-207            | 0.29            | 952.29        | 3284              | 21.03        | 72.5                      | 0.17         | 0.6               | 18.8         | 64.7              | 5.7          | 19.7         | 9.37        | 32.3         |
| BDE-206            | 0.15            | 626.79        | 4179              | 8.72         | 58.1                      | 0.07         | 0.5               | 15           | 100.7             | 2.8          | 18.7         | 9.49        | 63.3         |
| BDE-209            | 2.1             | 17587         | 8375              | 1491         | 710.0                     | 0.85         | 0.4               | 3009         | 1432.9            | 432.7        | 206.1        | 961         | 457.6        |
| $\Sigma_{13}$ PBDE | <b>3.3</b>      | <b>20,431</b> | <b>6191</b>       | <b>1568</b>  | <b>475</b>                | <b>3</b>     | <b>0.9</b>        | <b>3110</b>  | <b>942.4</b>      | <b>451.4</b> | <b>136.8</b> | <b>1051</b> | <b>318.5</b> |
| pH                 | <b>8.04</b>     | <b>7.7</b>    |                   | <b>7.89</b>  |                           | <b>7.87</b>  |                   | <b>8.4</b>   |                   | <b>8.31</b>  |              | <b>8.29</b> |              |
| TOC                | <b>3.13</b>     | <b>36.3</b>   |                   | <b>7.83</b>  |                           | <b>1.51</b>  |                   | <b>4.9</b>   |                   | <b>3.35</b>  |              | <b>4.43</b> |              |

**Table S3.** PBDE median concentrations (ng/g dry weight) across various e-waste sites; and exceedance (Ex) of PBDE concentrations in soil and dusts across various e-waste sites compared to control sites in Ibadan.

| PBDE                 | Top Soil 0–10cm |               |       | Floor Dust (Control Soil) |       |              |        | Direct Dust       |        |              |       |
|----------------------|-----------------|---------------|-------|---------------------------|-------|--------------|--------|-------------------|--------|--------------|-------|
|                      | Control         | Burning Sites |       | Dismantling Sites         |       | Repair Sites |        | Dismantling Sites |        | Repair Sites |       |
|                      | Median          | Median        | Ex    | Median                    | Ex    | Median       | Ex     | Median            | Ex     | Median       | Ex    |
| BDE-28               | 0.03            | 18.5          | 617   | 0.04                      | 1.33  | 1.03         | 34.3   | 1.24              | 41.3   | 3.8          | 127   |
| BDE-47               | 0.12            | 83            | 693   | 0.2                       | 1.7   | 4.12         | 34.3   | 64.6              | 538.33 | 14.62        | 122   |
| BDE-100              | 0.1             | 20            | 200   | 0.17                      | 1.7   | 1.51         | 15.1   | 24.2              | 242    | 4.8          | 48    |
| BDE-99               | 0.27            | 107           | 396.3 | 0.42                      | 1.6   | 10.64        | 39.41  | 151.2             | 560    | 26           | 95.2  |
| BDE-154              | 0.09            | 22.5          | 250   | 0.1                       | 1.1   | 1.61         | 18     | 12.4              | 138    | 4.3          | 47.8  |
| BDE-153              | 0.17            | 60            | 363.6 | 0.5                       | 3.03  | 7.5          | 45.5   | 33.1              | 201    | 12.4         | 75.15 |
| BDE-138              | 0               | 3.5           | 0     | 0                         |       | 0.43         |        | 1.73              |        | 1.05         |       |
| BDE-183              | 0.07            | 38.7          | 553   | 1.2                       | 17.14 | 14.5         | 206.57 | 16.7              | 238.6  | 15.5         | 221   |
| BDE-190              | 0.03            | 32.4          | 1080  | 0.1                       | 3.33  | 1.5          | 50     | 2.6               | 87     | 4.9          | 163.3 |
| BDE-208              | 0.15            | 174           | 1157  | 1.2                       | 8     | 25           | 164.7  | 14.2              | 94.5   | 25.3         | 168.3 |
| BDE-207              | 0.27            | 367           | 1360  | 1.9                       | 7.04  | 78.4         | 290.37 | 31.7              | 117.4  | 42           | 155.6 |
| BDE-206              | 0.19            | 120           | 632   | 0.4                       | 2.11  | 65           | 342    | 31.7              | 167    | 33.44        | 176   |
| BDE-209              | 9               | 5850          | 650   | 13                        | 1.44  | 8043         | 893.7  | 3181              | 353.   | 1464         | 162.7 |
| ∑ <sub>13</sub> PBDE | 10.4            | 6895          | 660   | 18                        | 1.7   | 8272         | 792    | 3566              | 342    | 1618         | 155   |
| pH                   | <b>8.2</b>      | <b>8.19</b>   |       | <b>5</b>                  |       | <b>8.8</b>   |        | -                 |        | <b>9</b>     |       |
| TOC                  | <b>3.6</b>      | <b>16.78</b>  |       | <b>5.8</b>                |       | <b>5.29</b>  |        | -                 |        | <b>18.56</b> |       |

**Table S4.** PBDE median concentrations (ng/g dry weight) across various e-waste sites; and exceedance (Ex) of PBDE concentrations in soil and dusts across various e-waste sites compared to control sites in Aba.

| Top Soil 0–10cm (Control Roadside Dust) |         |               |        | Floor Dust (Control Roadside Dust) |       | Roadside Dust (Control Roadside Dust) |       | Title       |
|-----------------------------------------|---------|---------------|--------|------------------------------------|-------|---------------------------------------|-------|-------------|
| PBDE                                    | Control | Burning sites |        | Repair Sites                       |       | Repair Sites                          |       | Control     |
|                                         | Median  | Median        | Ex     | Median                             | Ex    | Median                                | Ex    |             |
| BDE-28                                  | 0.02    | 2.3           | 115    | 0.16                               | 8     | 1.44                                  | 72.00 | 0.02        |
| BDE-47                                  | 0.47    | 5.6           | 11.91  | 1.42                               | 3.02  | 3.9                                   | 8.30  | 0.47        |
| BDE-100                                 | 0.18    | 1.64          | 9.11   | 0.38                               | 2.11  | 0.6                                   | 3.33  | 0.18        |
| BDE-99                                  | 1.08    | 11.7          | 10.83  | 2.55                               | 2.36  | 5.84                                  | 5.41  | 1.08        |
| BDE-154                                 | 0.13    | 7.74          | 59.54  | 0.43                               | 3.31  | 2.46                                  | 18.92 | 0.13        |
| BDE-153                                 | 0.23    | 20.7          | 90.00  | 1.6                                | 6.96  | 7.9                                   | 34.35 | 0.32        |
| BDE-138                                 | 0.02    | 1.6           | 80.00  | 0.1                                | 5.00  | 0.54                                  | 27.00 | 0.02        |
| BDE-183                                 | 0.33    | 13.4          | 40.61  | 8.72                               | 26.42 | 4.56                                  | 13.82 | 0.33        |
| BDE-190                                 | 0.07    | 7.5           | 107.14 | 0.37                               | 5.29  | 2.82                                  | 40.29 | 0.07        |
| BDE-208                                 | 0.57    | 4.4           | 7.72   | 3.4                                | 5.96  | 2.57                                  | 4.51  | 0.57        |
| BDE-207                                 | 1.13    | 8.74          | 7.73   | 10                                 | 8.85  | 3.46                                  | 3.06  | 1.13        |
| BDE-206                                 | 1.2     | 3.63          | 3.03   | 6                                  | 5.00  | 2.15                                  | 1.79  | 1.1         |
| BDE-209                                 | 71.5    | 103.3         | 1.44   | 534                                | 7.47  | 69                                    | 0.97  | 71.5        |
| $\sum_{13}$ PBDE                        | 77.5    | 192           | 2.5    | 553                                | 7.1   | 106                                   | 1.4   | 77.5        |
| pH                                      |         | <b>7.52</b>   |        | <b>8.11</b>                        |       | <b>8.1</b>                            |       | <b>8.17</b> |
| TOC                                     |         | <b>16.11</b>  |        | <b>2.46</b>                        |       | <b>1.5</b>                            |       | <b>1.44</b> |

**Table S5.** F-values of the two-Way ANOVA for PBDE concentration in all sample types across the Activity sites (burning, dismantling, repair sites).

| PBDEs              | Soil                                            | Floor Dust                                            | Roadside Dust                                          | Direct Dust                                           |
|--------------------|-------------------------------------------------|-------------------------------------------------------|--------------------------------------------------------|-------------------------------------------------------|
|                    | F(df) = value<br>Buring Dismantling and Control | T-value t(df) = value<br>Dismantling and Repair Sites | T-value t(df) = value<br>Dismantling and Control Sites | T-value t(df) = value<br>Dismantling and Repair Sites |
| BDE-28             | (3.17) = 1.122                                  | (27) = 1.366                                          | (10) = 0.327 ***                                       | (4) = -0.694                                          |
| BDE-47             | (3.17) = 3.467 *                                | (27) = 3.728                                          | (10) = 4.267 ***                                       | (4) = 0.862                                           |
| BDE-100            | (3.17) = 3.529 *                                | (27) = 5.401                                          | (10) = 5.260 ***                                       | (4) = 2.886*                                          |
| BDE-99             | (3.17) = 4.318 *                                | (27) = 4.314                                          | (10) = 4.390 ***                                       | (4) = -1.217                                          |
| BDE-154            | (3.17) = 5.348 **                               | (27) = 4.886                                          | (10) = 6.171 ***                                       | (4) = 2.214                                           |
| BDE-153            | (3.17) = 5.130 **                               | (27) = 0.988                                          | (10) = 6.565 ***                                       | (4) = 0.394                                           |
| BDE-138            | (3.17) = 5.708 **                               | (27) = 3.058                                          | (10) = 3.154 **                                        | (4) = 0.830                                           |
| BDE-183            | (3.17) = 6.336 **                               | (27) = 0.525                                          | (10) = 5.841 ***                                       | (4) = -0.079                                          |
| BDE-190            | (3.17) = 4.910 *                                | (27) = 3.716                                          | (10) = 6.017 ***                                       | (4) = -0.373                                          |
| BDE-208            | (3.17) = 6.438 **                               | (27) = 0.617                                          | (10) = 3.308 **                                        | (4) = -0.565                                          |
| BDE-207            | (3.17) = 6.038 **                               | (27) = 0.380                                          | (10) = 3.555 **                                        | (4) = -0.445                                          |
| BDE-206            | (3.17) = 3.502 *                                | (27) = 0.195                                          | (10) = 2.387 *                                         | (4) = -0.405                                          |
| BDE-209            | (3.17) = 4.796 *                                | (27) = 0.159                                          | (10) = 2.543 *                                         | (4) = -0.137                                          |
| $\Sigma_{13}$ PBDE |                                                 |                                                       |                                                        |                                                       |

\*\*\* =  $p < 0.001$ . \*\* =  $p < 0.01$ . \* =  $P < 0.05$ .

**Table S6.** F-values of the two-Way ANOVA for PBDE concentration in top soils across the locations(Lagos, Ibadan, Aba) and Activity sites (burning, dismantling, repair, and control sites).

| PBDEs              | Activity Sites ( $\eta$ ) | Location ( $\eta$ )   | Activity site # location ( $\eta$ ) |
|--------------------|---------------------------|-----------------------|-------------------------------------|
| BDE-28             | 21620.752 (1.000) ***     | 29885.907 (1.000) *** | 29739.812 (1.000) ***               |
| BDE-47             | 3.066 (0.414) *           | 0.361 (0.053)         | 0.871 (0.118)                       |
| BDE-100            | 5.026 (0.537) **          | 1.829 (0.220)         | 0.615 (0.086)                       |
| BDE-99             | 3.656 (0.458) *           | 0.197 (0.029)         | 0.625 (0.088)                       |
| BDE-154            | 6.676 (0.606) **          | 1.603 (0.198)         | 1.027 (0.136)                       |
| BDE-153            | 5.673 (0.567) **          | 0.827 (0.113)         | 1.230 (0.159)                       |
| BDE-138            | 4.764 (0.524) **          | 0.493 (0.070)         | 0.367 (0.053)                       |
| BDE-183            | 8.654 (0.666) ***         | 2.039 (0.239)         | 0.599 (0.084)                       |
| BDE-190            | 7.084 (0.620) **          | 2.520 (0.279)         | 0.989 (0.132)                       |
| BDE-208            | 11.822 (0.732) ***        | 4.062 (0.385) *       | 0.984 (0.131)                       |
| BDE-207            | 11.728 (0.730) ***        | 4.125 (0.388) *       | 1.180 (0.154)                       |
| BDE-206            | 5.706 (0.568) **          | 2.406 (0.270)         | 1.062 (0.140)                       |
| BDE-209            | 10.025 (0.698) ***        | 3.251 (0.333)         | 2.845 (0.304)                       |
| $\Sigma_{13}$ PBDE | 9.886 (0.695) ***         | 3.160 (0.327)         | 2.539 (0.281)                       |

\*\*\* =  $p < 0.001$ . \*\* =  $p < 0.01$ . \* =  $p < 0.05$ .  $\eta$  = partial Eta squared. # = interaction effect

**Table S7.** F-values of the two-Way ANOVA for PBDE concentration in floor dust across the locations (Lagos. Ibadan. Aba) and Activity sites (dismantling and repair sites).

| PBDEs              | Activity Sites ( $\eta$ ) | Location ( $\eta$ ) | Activity Site # Location ( $\eta$ ) |
|--------------------|---------------------------|---------------------|-------------------------------------|
| BDE-28             | 0.501 (0.020)             | 2.855 (0.192)       | 0.009 (0.000)                       |
| BDE-47             | 24.776 (0.508) ***        | 8.215 (0.406) **    | 0.759 (0.031)                       |
| BDE-100            | 30.994 (0.564) ***        | 3.961 (0.248) *     | 2.165 (0.083)                       |
| BDE-99             | 27.732 (0.536) ***        | 7.135 (0.373) **    | 1.832 (0.071)                       |
| BDE-154            | 22.493 (0.484) ***        | 3.262 (0.214)       | 5.311 (0.181) *                     |
| BDE-153            | 0.642 (0.026)             | 1.344 (0.101)       | 0.154 (0.006)                       |
| BDE-138            | 6.639 (0.217) **          | 2.189 (0.154)       | 0.940 (0.038)                       |
| BDE-183            | 0.013 (0.001)             | 0.832 (0.065)       | 2.074 (0.080)                       |
| BDE-190            | 8.460 (0.261) **          | 1.401 (0.105)       | 4.462 (0.157)                       |
| BDE-208            | 0.004 (0.000)             | 1.853 (0.134)       | 2.982 (0.111)                       |
| BDE-207            | 0.027 (0.001)             | 1.680 (0.123)       | 3.319 (0.122)                       |
| BDE-206            | 0.015 (0.001)             | 1.742 (0.127)       | 2.430 (0.092)                       |
| BDE-209            | 0.673 (0.008)             | 0.284 (0.023)       | 2.642 (0.99)                        |
| $\Sigma_{13}$ PBDE | 0.124 (0.005)             | 0.315 (0.026)       | 2.471 (0.093)                       |

\*\*\* =  $p < 0.001$ . \*\* =  $p < 0.01$ . \* =  $p < 0.05$ .  $\eta$  = partial Eta squared. # = interaction effect



**Table S8.** Correlations between PBDEs congeners,  $\Sigma_{13}$ PBDE, pH and TOC (Top soils).

| PBDE congeners | BDE28 | BDE47 | BDE100 | BDE99 | BDE154 | BDE153 | BDE138 | BDE183 | BDE190 | BDE208 | BDE207 | BDE206 | BDE209 | pH    | TOC   |
|----------------|-------|-------|--------|-------|--------|--------|--------|--------|--------|--------|--------|--------|--------|-------|-------|
| BDE28          | 1     |       |        |       |        |        |        |        |        |        |        |        |        | 0.261 | 0.528 |
| BDE47          | 0.702 | 1     |        |       |        |        |        |        |        |        |        |        |        | 0.296 | 0.569 |
| BDE100         | 0.659 | 0.914 | 1      |       |        |        |        |        |        |        |        |        |        | 0.234 | 0.685 |
| BDE99          | 0.706 | 0.972 | 0.973  | 1     |        |        |        |        |        |        |        |        |        | 0.295 | 0.530 |
| BDE154         | 0.722 | 0.909 | 0.957  | 0.959 | 1      |        |        |        |        |        |        |        |        | 0.225 | 0.665 |
| BDE153         | 0.691 | 0.816 | 0.811  | 0.845 | 0.879  | 1      |        |        |        |        |        |        |        | 0.126 | 0.291 |
| BDE138         | 0.758 | 0.907 | 0.867  | 0.914 | 0.919  | 0.825  | 1      |        |        |        |        |        |        | 0.372 | 0.524 |
| BDE183         | 0.713 | 0.803 | 0.791  | 0.828 | 0.848  | 0.893  | 0.871  | 1      |        |        |        |        |        | 0.198 | 0.510 |
| BDE190         | 0.720 | 0.853 | 0.875  | 0.884 | 0.933  | 0.805  | 0.879  | 0.833  | 1      |        |        |        |        | 0.295 | 0.650 |
| BDE208         | 0.775 | 0.819 | 0.796  | 0.843 | 0.828  | 0.824  | 0.824  | 0.880  | 0.817  | 1      |        |        |        | 0.192 | 0.597 |
| BDE207         | 0.757 | 0.813 | 0.780  | 0.832 | 0.822  | 0.847  | 0.824  | 0.910  | 0.813  | 0.993  | 1      |        |        | 0.207 | 0.559 |
| BDE206         | 0.726 | 0.825 | 0.726  | 0.803 | 0.758  | 0.785  | 0.805  | 0.864  | 0.760  | 0.951  | 0.962  | 1      |        | 0.261 | 0.482 |
| BDE209         | 0.687 | 0.757 | 0.668  | 0.744 | 0.705  | 0.794  | 0.772  | 0.868  | 0.706  | 0.913  | 0.939  | 0.953  | 1      | 0.319 | 0.347 |

TOC = Total Organic matter content; \*\* correlation is significant at the 0.01 level(2-tailed); \* correlation is significant at the 0.05 level(2-tailed)
